# Supplementary material for: Controlled Fabrication of Hierarchically Structured MnO2@NiCo-LDH Nanoarrays for Efficient Electrocatalytic Urea Oxidization
Source: MDPI journal article supplement (doi:10.3390/nano13152268), 2023-08-07
Supplement: s1 [file s1]

# Controlled Fabrication of Hierarchically Structured $\text{MnO}_2@\text{NiCo-LDH}$ Nanoarrays for Efficient Electrocatalytic Urea Oxidization

Wenjun Liu <sup>1</sup>, Wenbo Xu <sup>1</sup>, Guofa Dong <sup>2,\*</sup> and Ming Fang <sup>1,\*</sup>

<sup>1</sup> Shenzhen Key Laboratory of Special Functional Materials, Guangdong Research Centre for Interfacial Engineering of Functional Materials, College of Materials Science and Engineering, Shenzhen University, Shenzhen 518060, China; liuwj@szu.edu.cn (W.L.); xwbxwbxwb1996@gmail.com (W.X.)

<sup>2</sup> Fujian Key Laboratory of Functional Marine Sensing Materials, College of Materials and Chemical Engineering, Minjiang University, Fuzhou 350108, China

\* Correspondence: gfdong@mju.edu.cn (G.D.); m.fang@szu.edu.cn (M.F.)

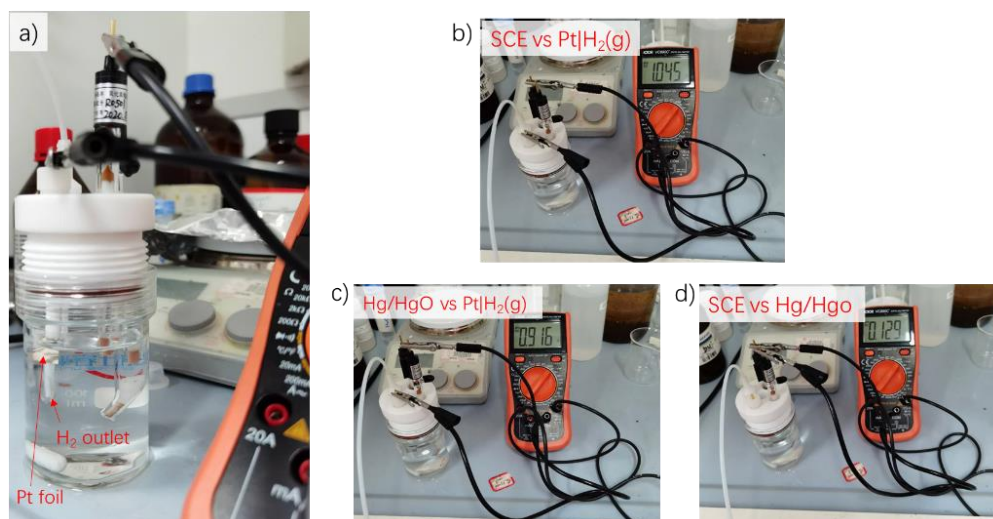

**Figure S1.** Potential calibration of the SCE and Hg/HgO against a Pt|H<sub>2</sub>(g) electrode in 1 M KOH. Note: H<sub>2</sub> gas was bubbled against a fresh polished platinum foil for at least 30 min, and the voltage measurements were conducted immediately after shutting off the gas to avoid any mechanical disturbance by the gas bubbling.

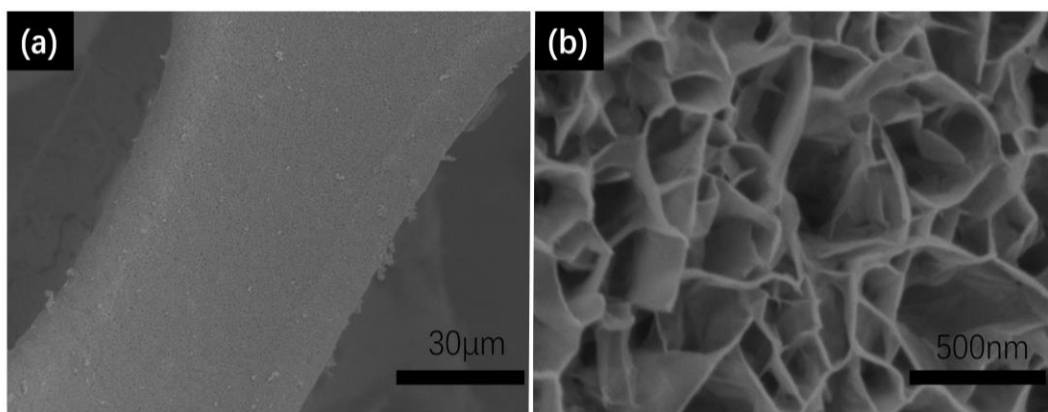

**Figure S2.** SEM images of MnO<sub>2</sub> nanosheet arrays grown on nickel foam (NF).

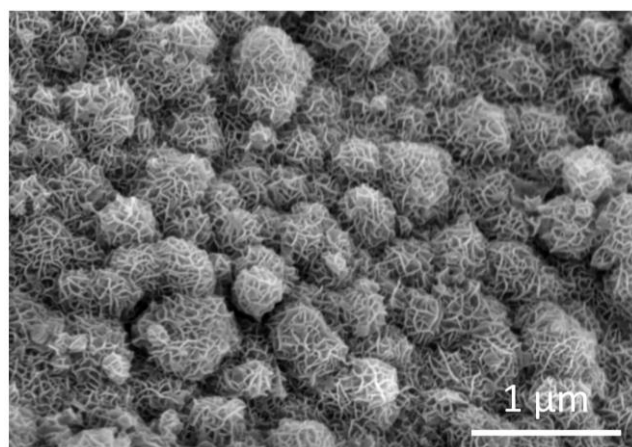

**Figure S3.** SEM image of CoNi-LDH deposited on NF.

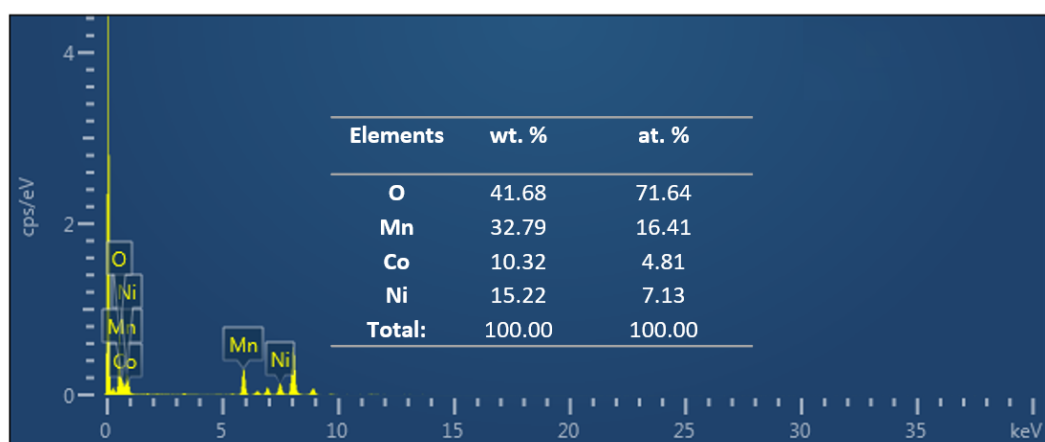

**Figure S4.** EDS spectrum of the mapping area.

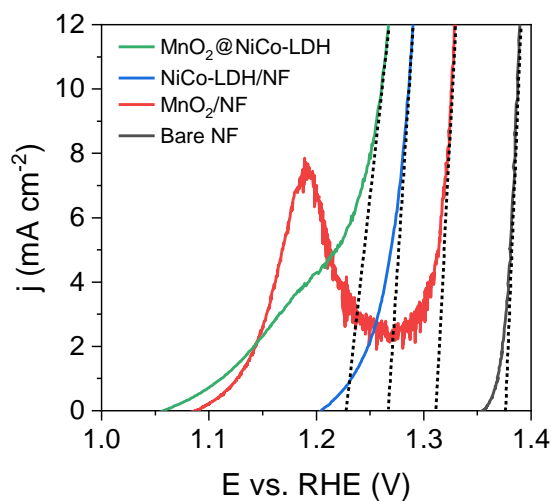

**Figure S5.** Enlarged view of the UOR LSV curves of different catalysts.

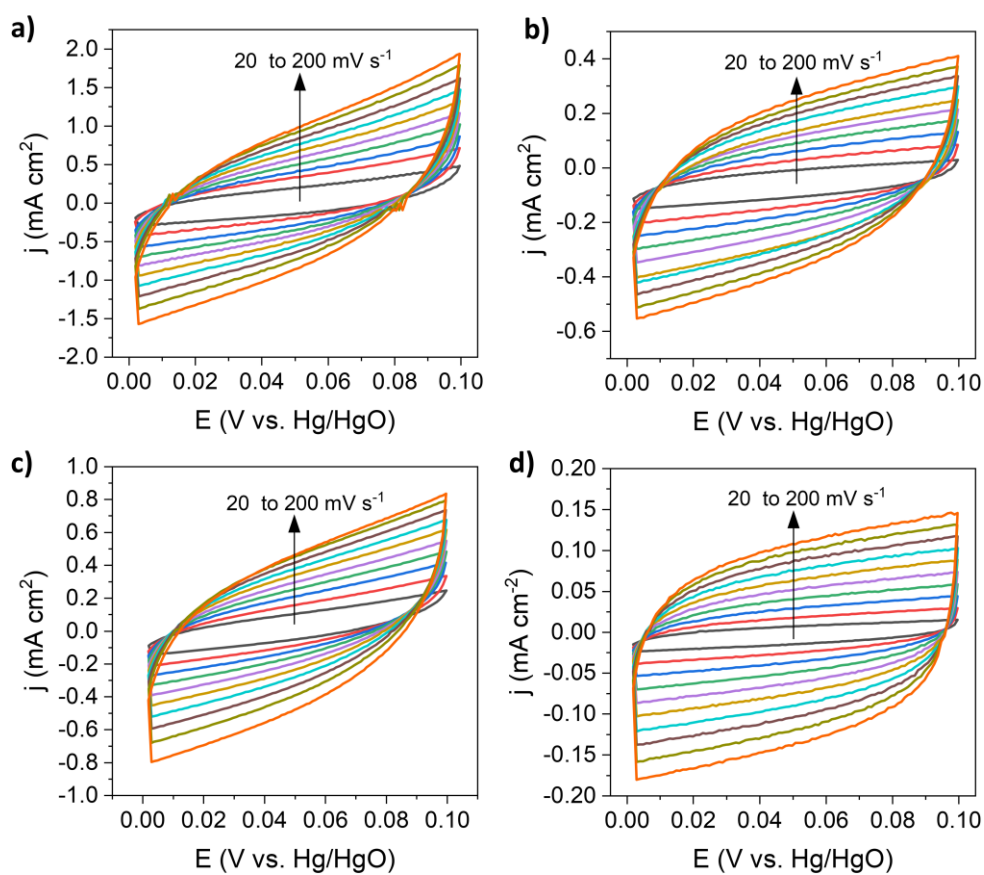

**Figure S6.** CV curves of a)  $\text{MnO}_2$ @NiCo-LDH, b) NiCo-LDH/NF, c)  $\text{MnO}_2$ /NF, and d) NF at different potential scan rates in the non-Faradaic potential range.

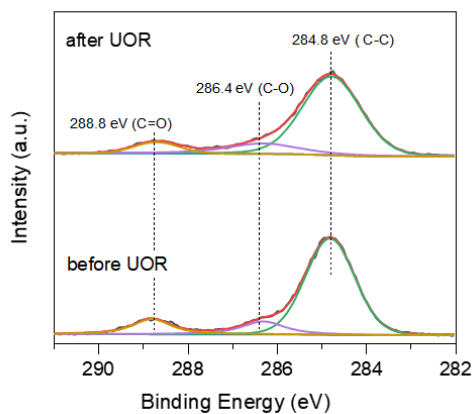

**Figure S7:** High-resolution calibrated C 1s XPS spectra of MnO<sub>2</sub>@NiCo-LDH before and after the UOR test.

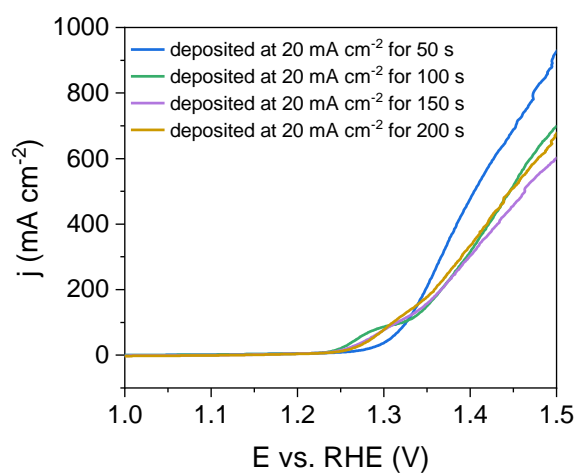

**Figure S8.** LSV curves of UOR of various MnO<sub>2</sub>@NiCo-LDH samples with different deposition time.

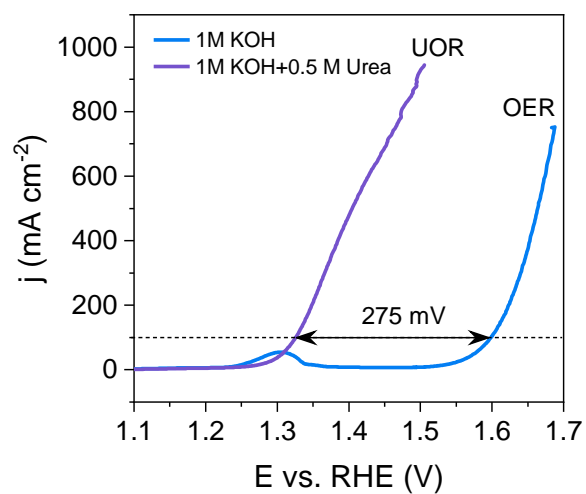

**Figure S9.** LSV curves of MnO<sub>2</sub>@NiCo-LDH deposited for 50 s for UOR and OER.

**Table S1.** Performance comparison of UOR catalysts reported recently.

| Catalysts                            | Electrolyte              | $j$ (mA cm <sup>-2</sup> ) | Potential (V)  | Reference                                      |
|--------------------------------------|--------------------------|----------------------------|----------------|------------------------------------------------|
| CoS <sub>2</sub> -MoS <sub>2</sub>   | 1.0 M KOH<br>0.5 M urea  | 10                         | 1.29           | Adv. Energy Mater., 2018, 1801775              |
| Ni <sub>3</sub> N/NF                 | 1.0 M KOH<br>0.5 M urea  | 100                        | 1.42           | ACS Appl. Mater. Interfaces, 2019, 11, 13168   |
| Mo-Co-S-Se/CC                        | 1.0 M KOH<br>0.5 M urea  | 10                         | 1.40           | ACS Sustainable Chem. Eng., 2019, 7, 16577     |
| NiMoO <sub>3</sub> S/NF              | 1.0 M KOH<br>0.5 M urea  | 10                         | 1.34           | Chem. Commun., 2020, 56, 11038                 |
| NiSe <sub>2</sub> -NiO 350           | 1.0 M KOH<br>0.33 M urea | 10                         | 1.33           | Appl. Catal. B Environ., 2020, 276,119165      |
| CoFeCr LDH/NF                        | 1.0 M KOH<br>0.33 M urea | 10                         | 1.31           | Appl. Catal. B Environ., 2020, 272,118959.     |
| NiMo <sub>x</sub> O <sub>y</sub> /NF | 1.0 M KOH<br>0.5 M urea  | 100                        | 1.36           | Applied Catalysis A, General, 2021 622, 118220 |
| Ni <sub>2</sub> Fe(CN) <sub>6</sub>  | 1.0 M KOH<br>0.33 M urea | 100                        | 1.35           | Nature Energy, 2021, 6, 904–912                |
| NiCoGe oxyhydroxide                  | 1.0 M KOH<br>0.33 M urea | 100                        | 1.33           | Adv. Funct. Mater., 2023, 33, 2300687          |
| Ni-TPA@NiSe/NF                       | 1.0 M KOH<br>0.5 M urea  | 100                        | 1.37           | ACS Catal. 2023, 13, 837–847                   |
| MnO <sub>2</sub> @NiCo-LDH           | 1.0 M KOH<br>0.5 M urea  | 10<br>100                  | 1.262<br>1.326 | <b>This work</b>                               |
